# Supplementary material for: Individual Immune Cell and Cytokine Profiles Impact Platelet-Rich Plasma Composition
Source: Research Square preprint supplement (doi:10.21203/rs.3.rs-1619463/v1), 2022-05-05
Supplement: Supplementary file 1 [file 85a384c61ec51657d1e95586.docx]

**Titles and Descriptions of Supplementary Files**

**Figure S1**. Gating strategy derived from Kaluza Analysis. a) Gating strategy for basic characterization, and b) for T cell subset characterization.

**Figure S2**. Portion of monocyte subsets in the PRP and donor blood samples. a) displays classical (CD45+CD14highCD16−), b) non-classical (CD45+CD14dimCD16+), and c) intermediate subgroup of monocytes (CD45+CD14highCD16+).

**Figure S3**. Correlation analysis of B, T, and NK cells. a) CD19+ B cells (ACP®: r = 0.937, *p* < 0.0001; Angel™: r = 0.961, *p* < 0.0001; nSTRIDE® APS: r = 0.847, *p* = 0.0005), b) CD3+ T cells (ACP®: r = 0.73, *p* = 0.007; Angel™: r = 0.558, *p* = 0.06; nSTRIDE® APS: r = 0.108, *p* = 0.739), and c) CD3-CD56+ NK cells (ACP®: r = 0.944, *p* < 0.0001; Angel™: r = 0.629, *p* = 0.028; nSTRIDE® APS: r = 0.368, *p* = 0.239). Abbreviations: NK cells: Natural killer cells.

**Figure S4**. Correlation analysis of a) CD4+ and b) CD8+ T cells in donor blood and corresponding PRP samples.

**Figure S5**. Correlation analysis of CD4+ T cell substes, including central memory (a), naive (b), effector memory (c), and TEMRA (d) T cells in donor blood and corresponding PRP samples.

**Figure S6**. Correlation analysis of CD8+ T cell substes, including central memory (a), naive (b), effector memory (c), and TEMRA (d) T cells in donor blood and corresponding PRP samples.
